# Supplementary material
Source: PubMed Central journal article supplement (PMC3305806)

**Figure S1 (Guo et al.)**

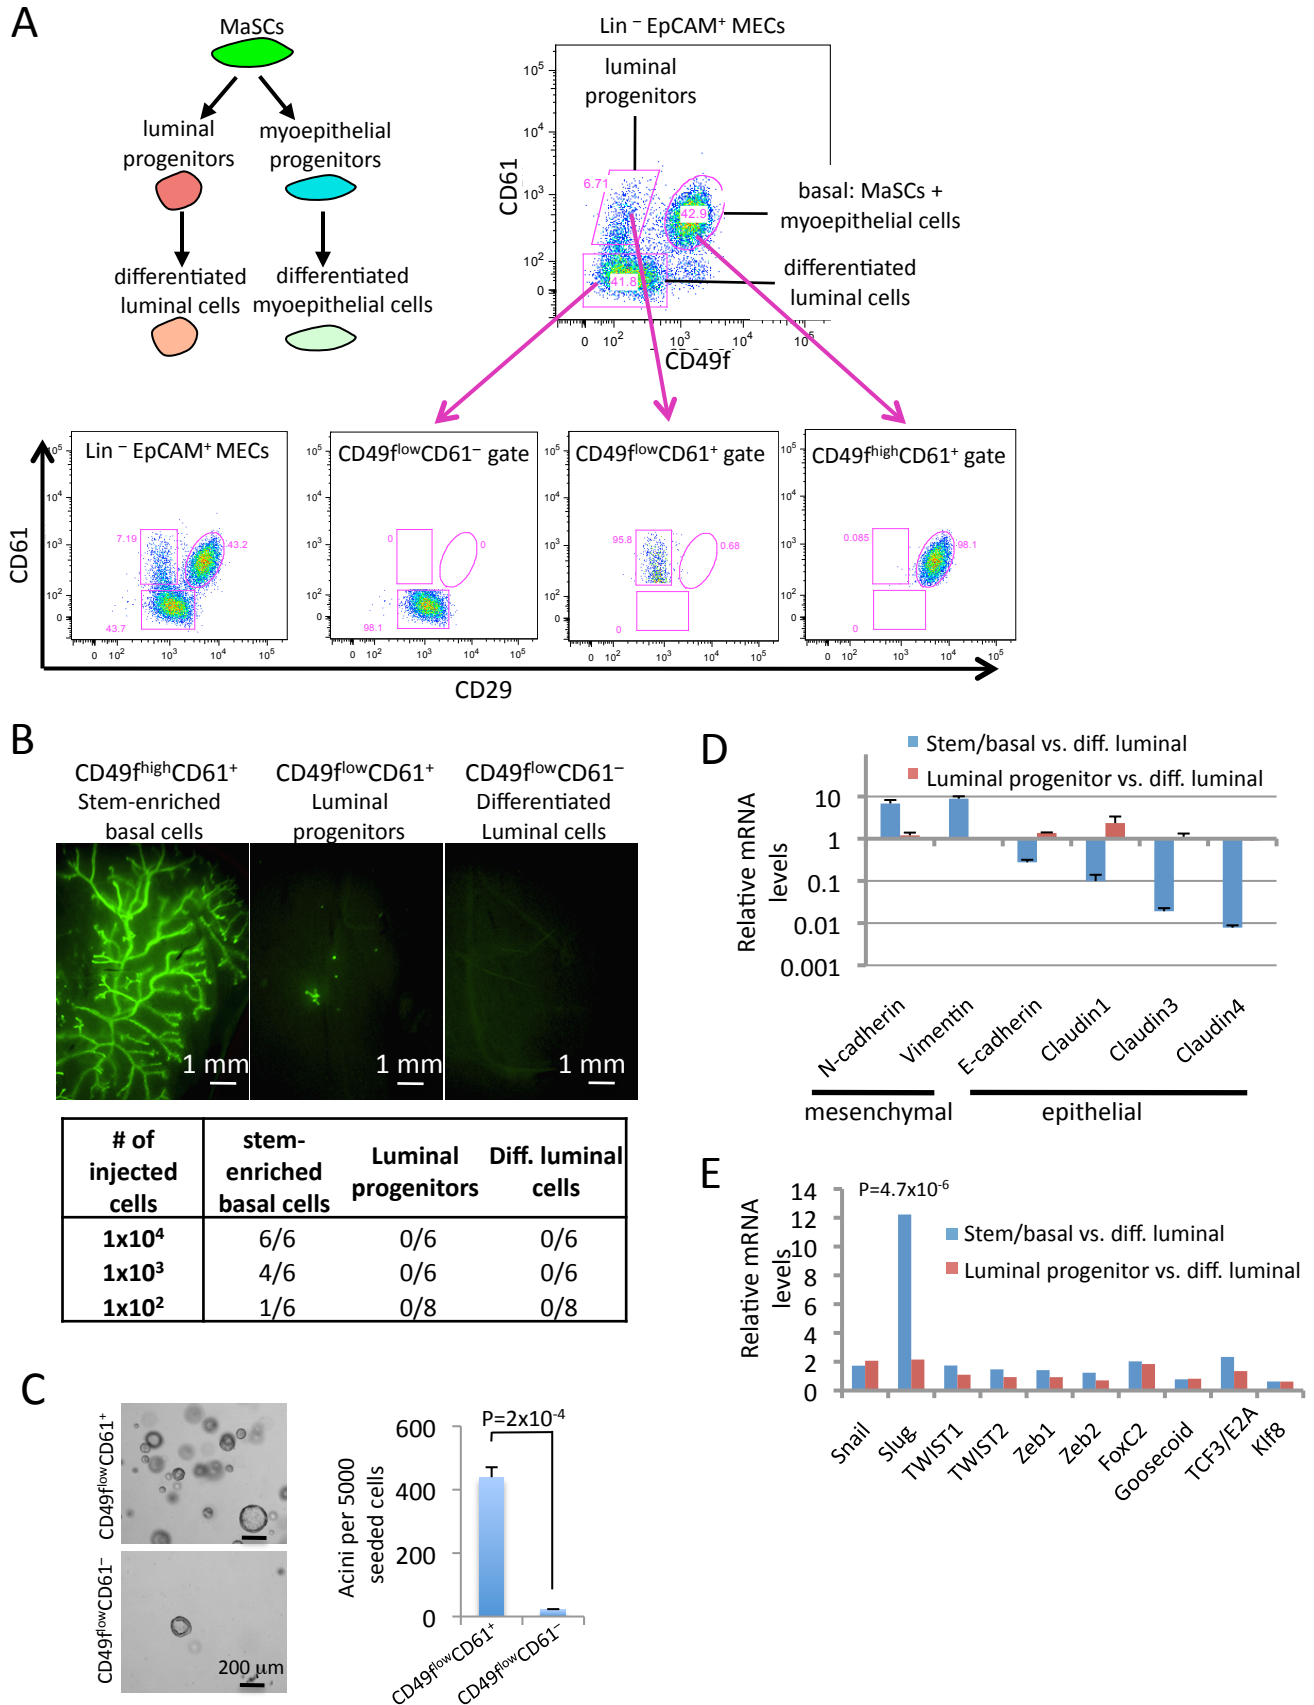

Figure S2 (Guo et al.)

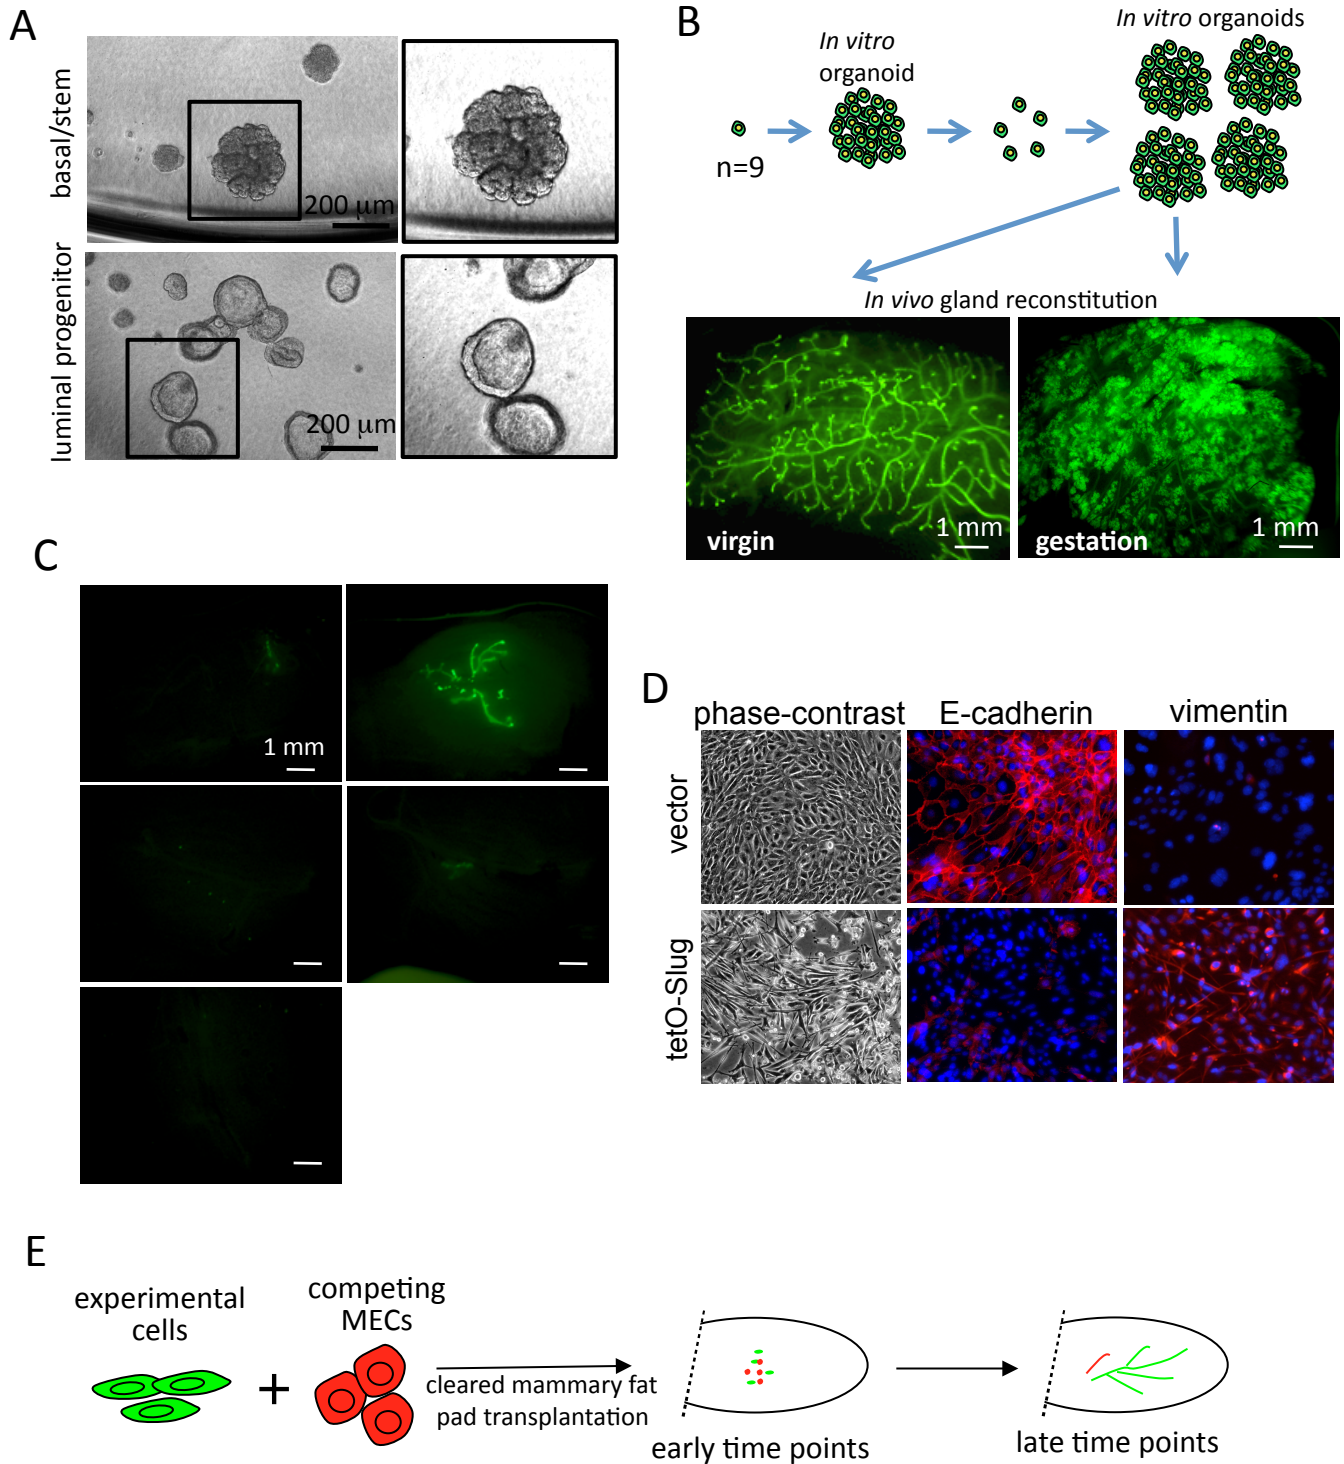

**Figure S3 (Guo et al.)**

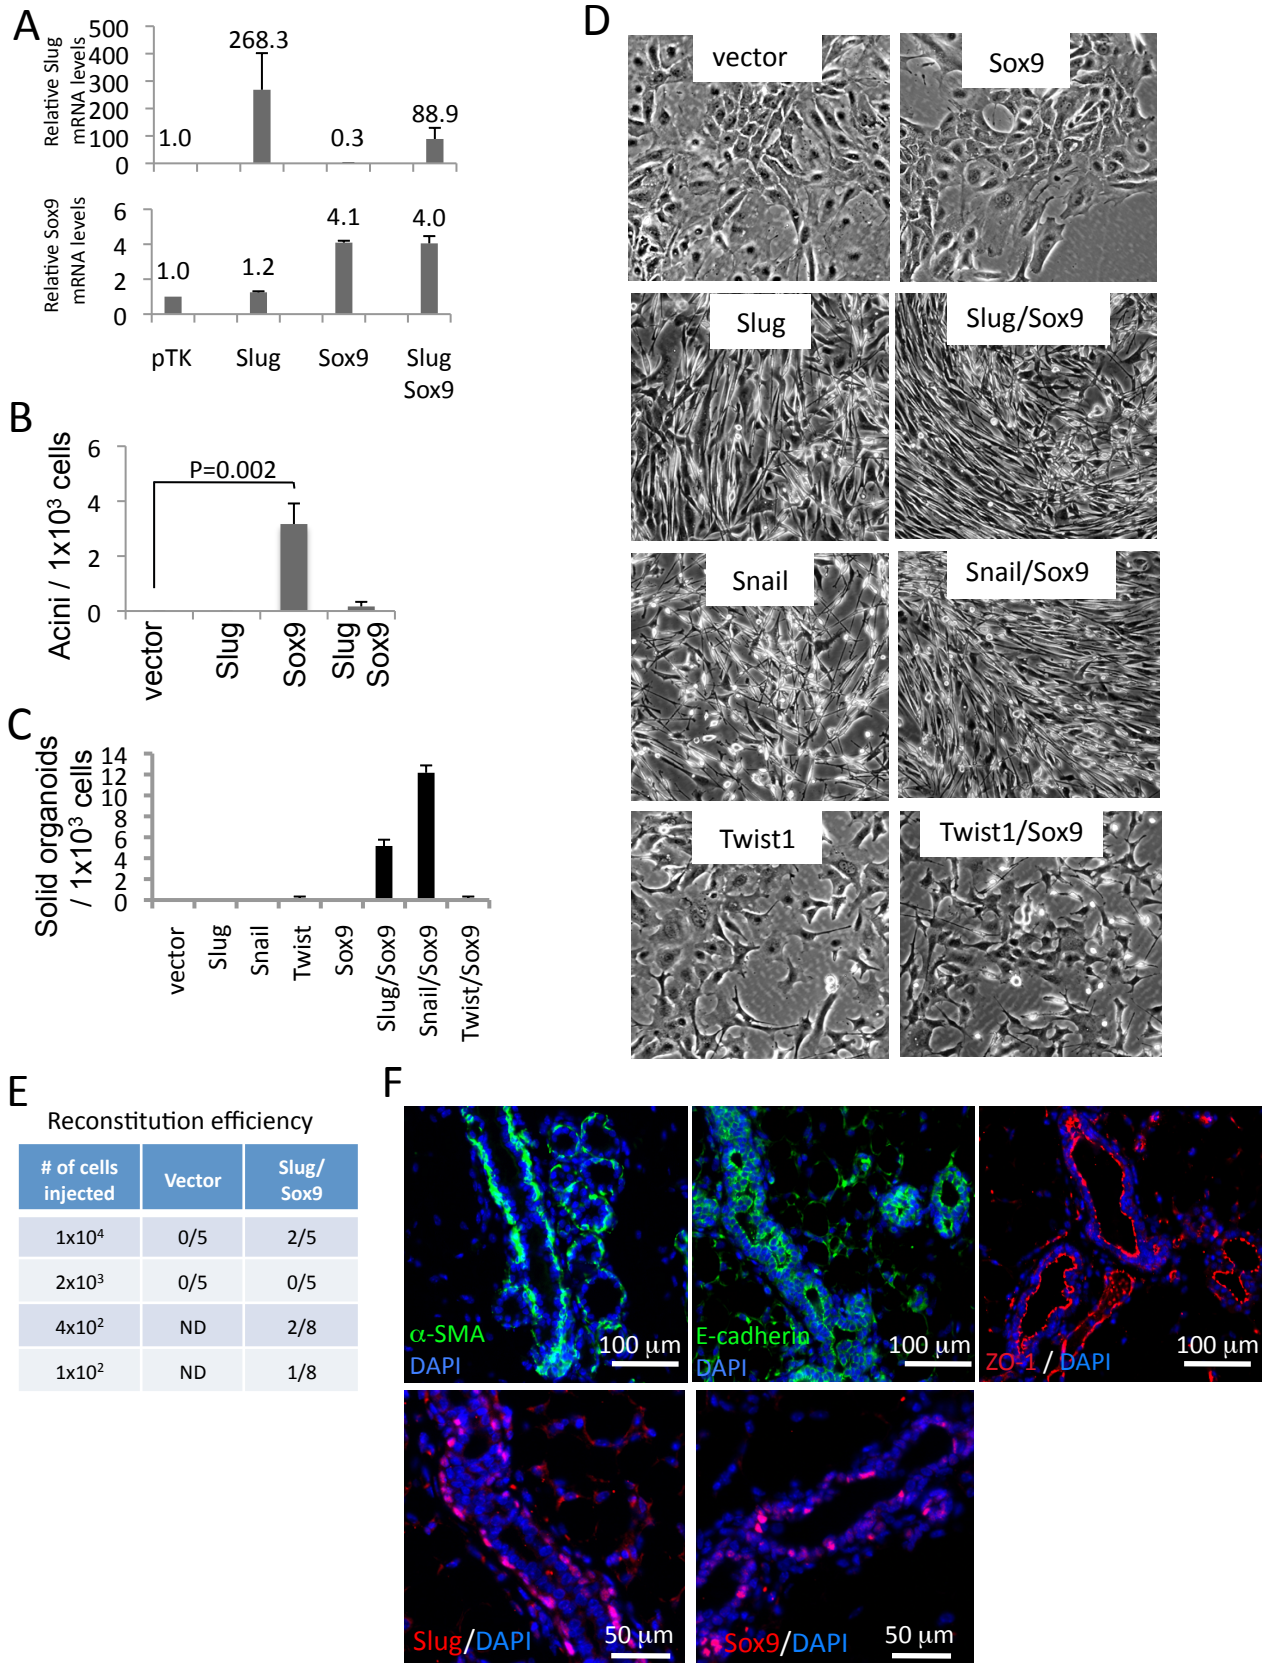

Figure S4 (Guo et al)

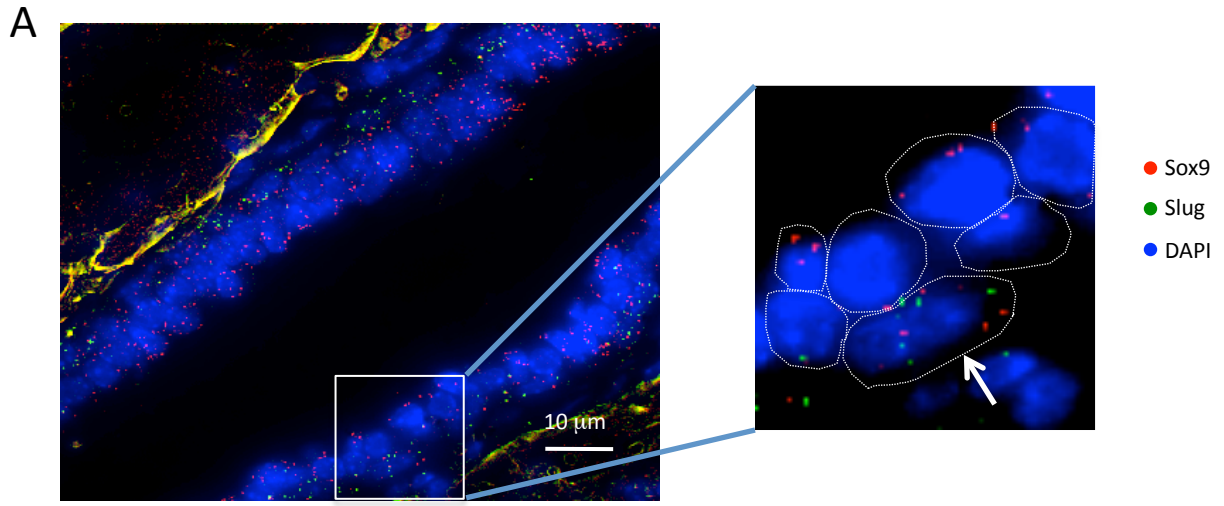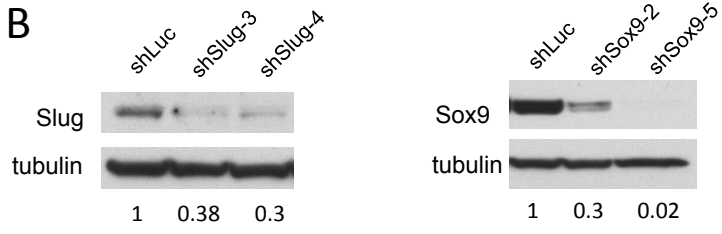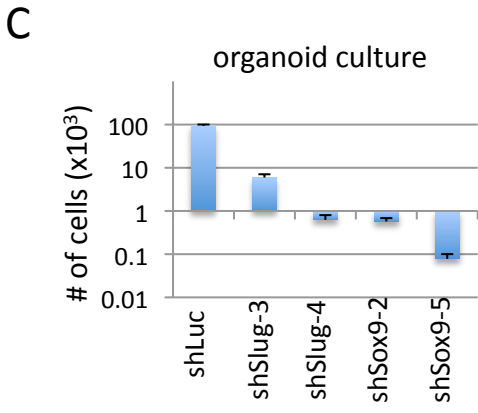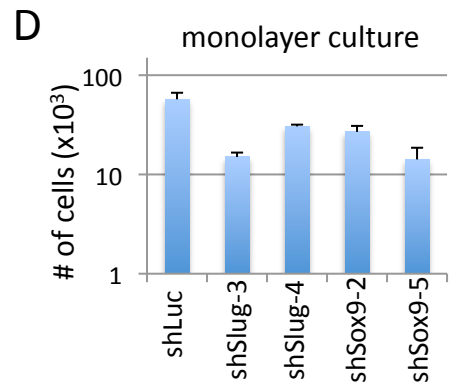

**Figure S5 (Guo et al.)**

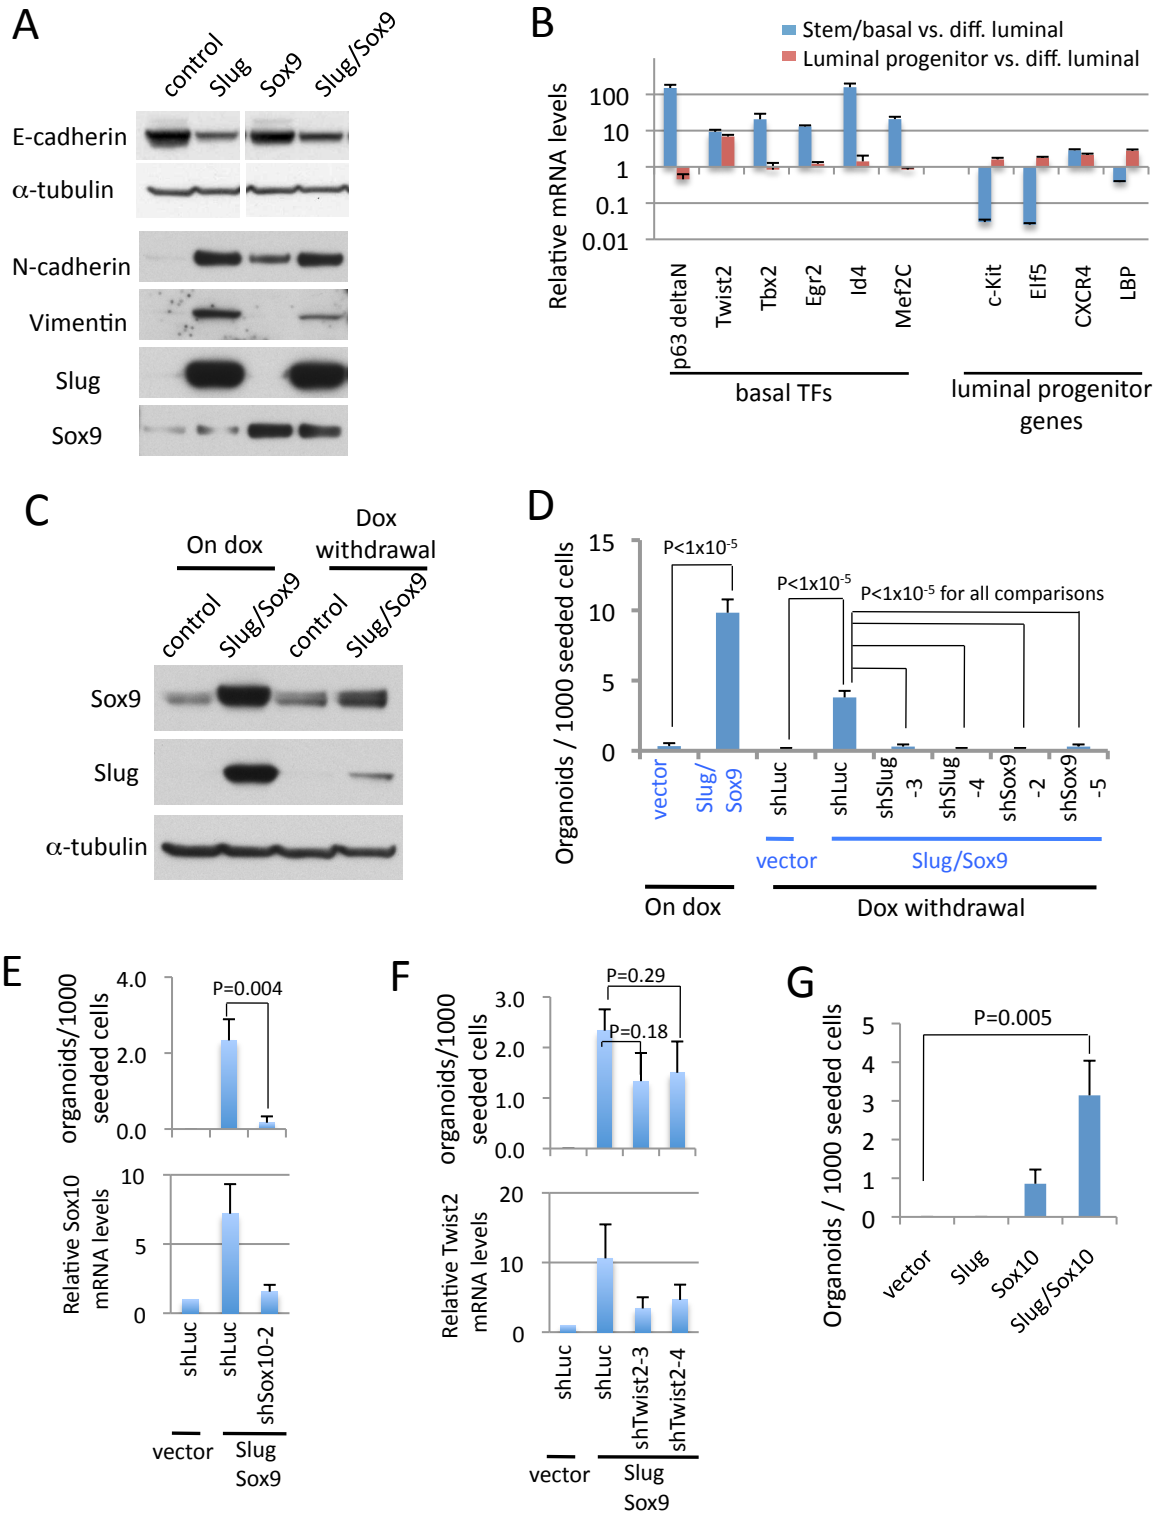

**Figure S6 (Guo et al.)**

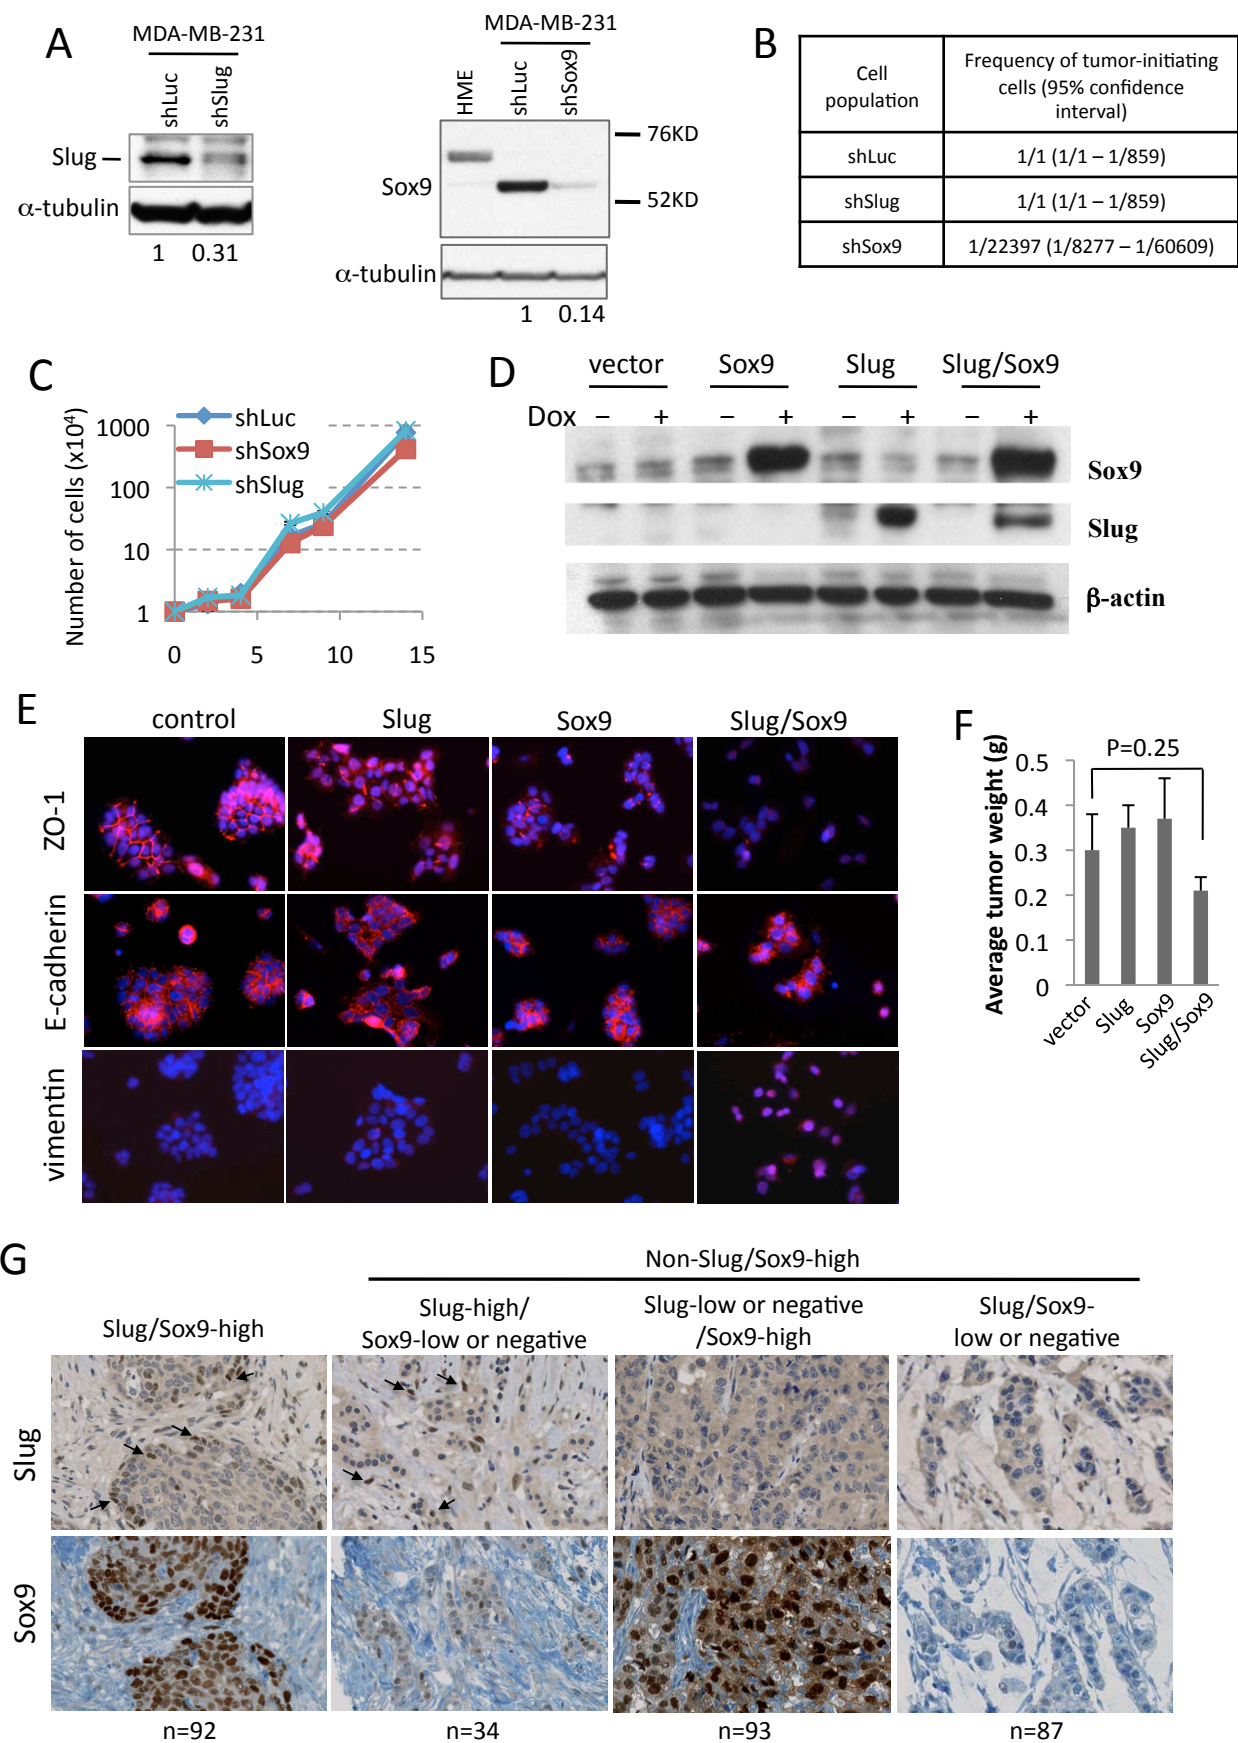

Supplement: NIHMS356700-supplement-02.pdf [file NIHMS356700-supplement-02.pdf]
